# Supplementary material for: α-Synuclein aggregation in the olfactory bulb induces olfactory deficits by perturbing granule cells and granular–mitral synaptic transmission
Source: PubMed Central journal article supplement (PMC8668919; doi:10.1038/s41531-021-00259-7), 2021-12-13
Supplement: 41531_2021_259_MOESM2_ESM.pdf [file 41531_2021_259_MOESM2_ESM.pdf]

**$\alpha$ -Synuclein aggregation in the olfactory bulb induces olfactory deficits by perturbing granule cells and granular–mitral synaptic transmission**

Fengjiao Chen<sup>1,3</sup>, Wei Liu<sup>1,3</sup>, Penglai Liu<sup>1</sup>, Zhen Wang<sup>2</sup>, You Zhou<sup>2</sup>, Xingyu Liu<sup>2</sup>, Anan Li<sup>1,\*</sup>

<sup>1</sup>Jiangsu Key Laboratory of Brain Disease and Bioinformation, Research Center for Biochemistry and Molecular Biology, Xuzhou Medical University, Xuzhou, China

<sup>2</sup>School of Life Science, Xuzhou Medical University, Xuzhou, China

<sup>3</sup>These authors contributed equally.

**Running title:** Mechanism of  $\alpha$ -synuclein aggregation-induced olfactory deficit

Corresponding author: Anan Li, Address: 209th Tongshan Road, Xuzhou, Jiangsu, China, 221004; Email:

anan.li@xzhmu.edu.cn; Tel: 86-516-83262621

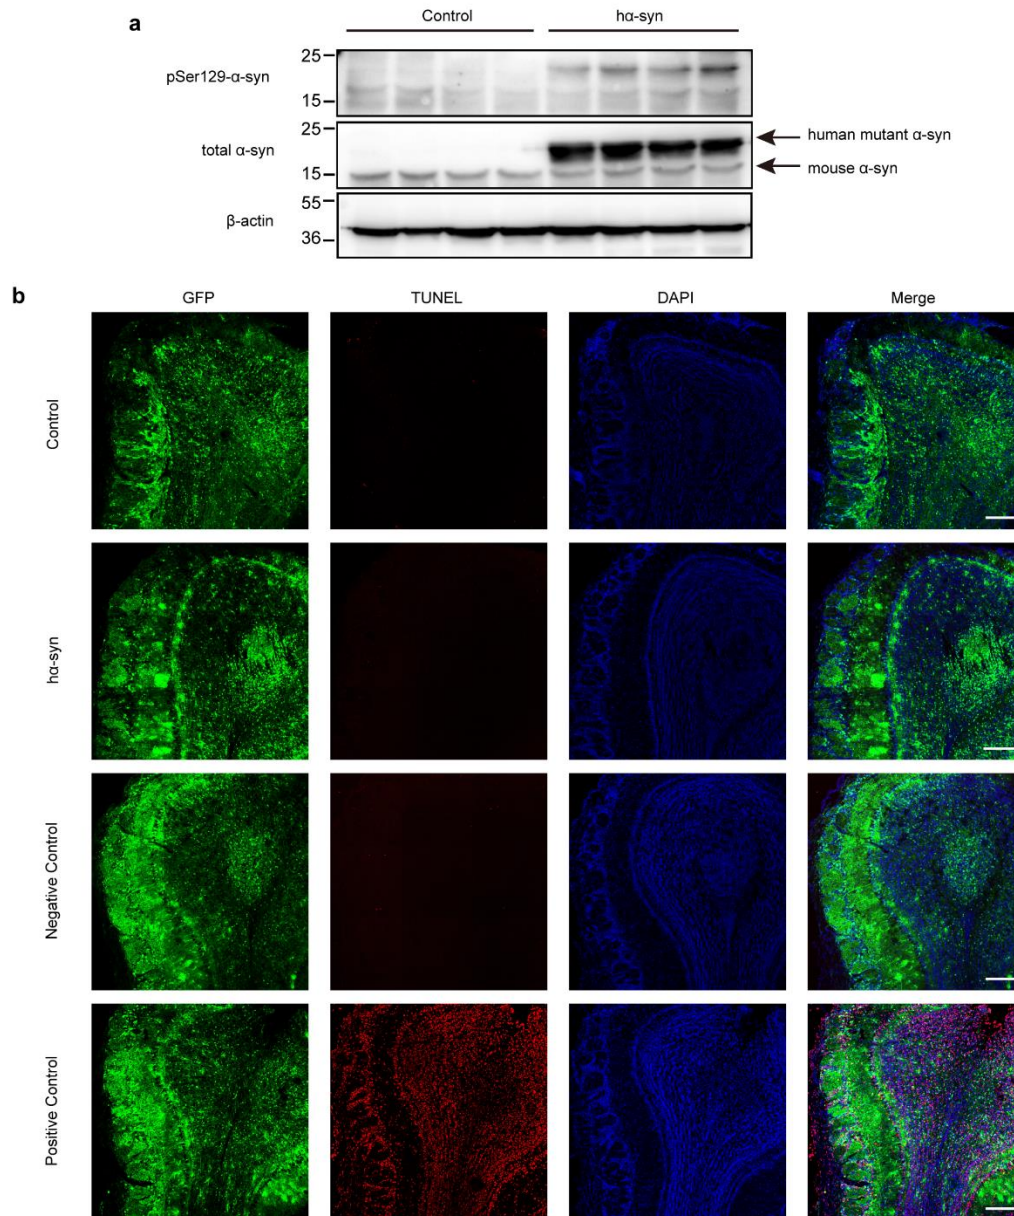

**Supplementary Fig. 1** Exogenous human  $\alpha$ -synuclein expression does not induce cell apoptosis in the OB. **a** The expression of pSer129- $\alpha$ -syn and total  $\alpha$ -syn in OB tissue from all four mice of each group three weeks after viral injection. **b** The representative TUNEL staining images of OB from control and ha-syn mouse three weeks after viral injection.  $\alpha$ -syn,  $\alpha$ -synuclein. Scale bars = 200  $\mu$ m.

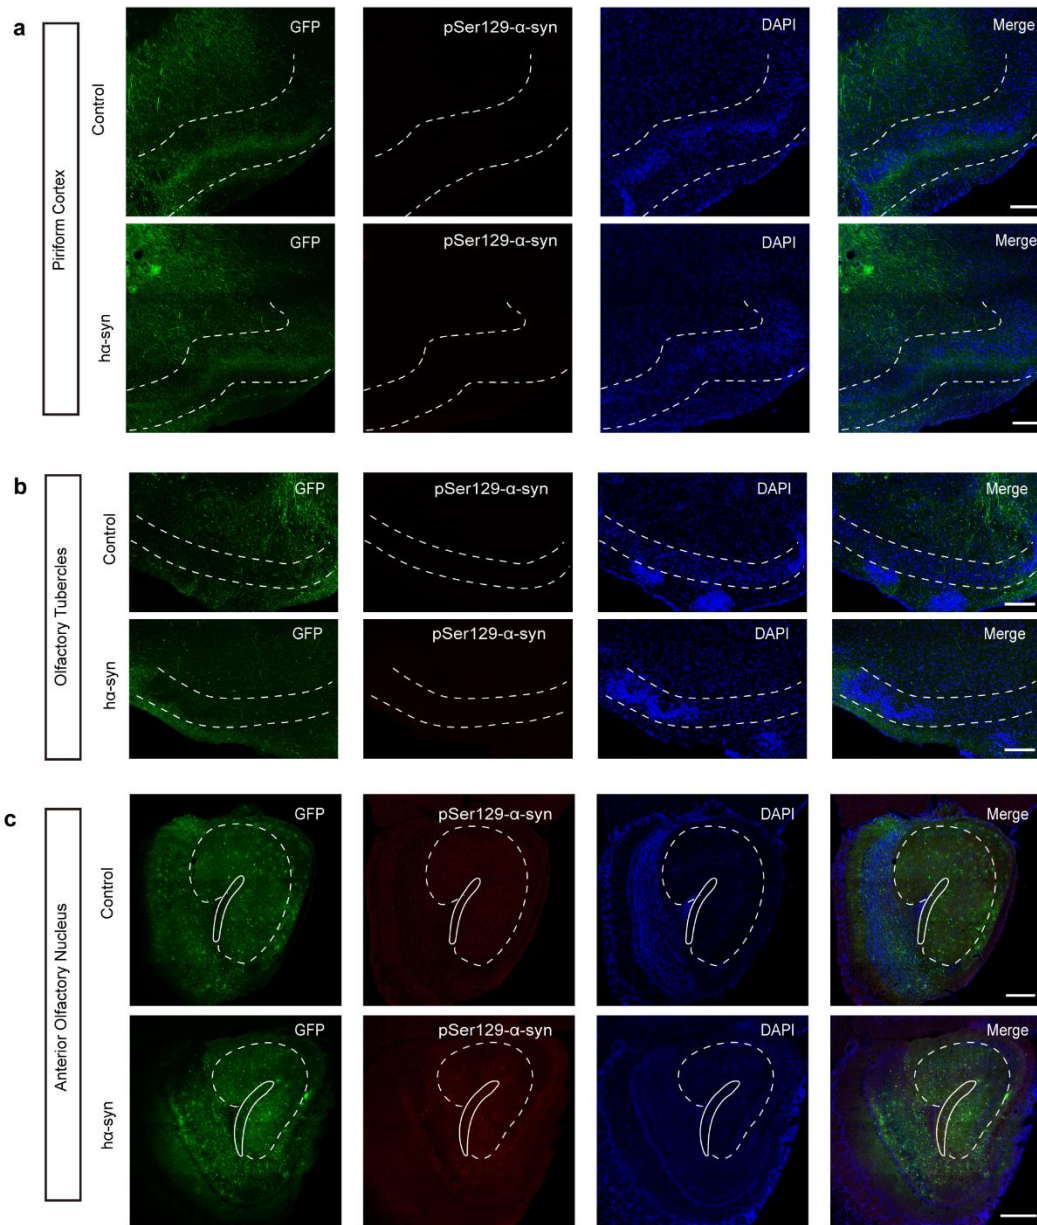

**Supplementary Fig. 2** The  $\alpha$ -synuclein pathology pattern in the higher olfactory areas. The representative images of piriform cortex (scale bars = 200  $\mu$ m) (a), olfactory tubercles (scale bars = 200  $\mu$ m) (b) and anterior olfactory nucleus (scale bars = 300  $\mu$ m) (c) areas from each group immunostained with anti-pSer129- $\alpha$ -syn antibody three weeks after viral injection. The corresponding olfactory regions were circled by white dashed lines.

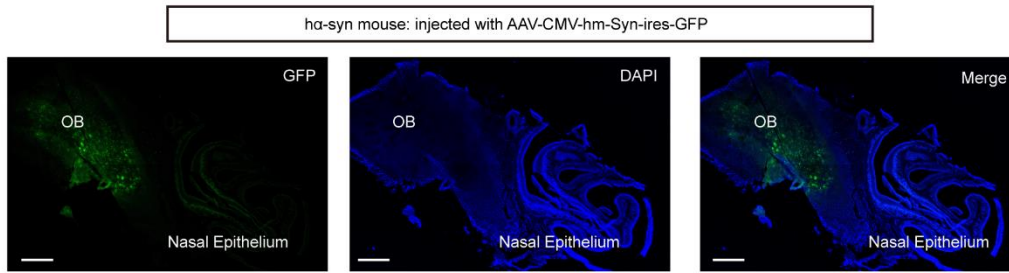

**Supplementary Fig. 3** The virus expression pattern in OB and nasal epithelium. The representative images from  $ha$ -syn group show that there was no GFP<sup>+</sup> cells in nasal epithelium three weeks after the viral injection. Scale bars = 500  $\mu$ m.

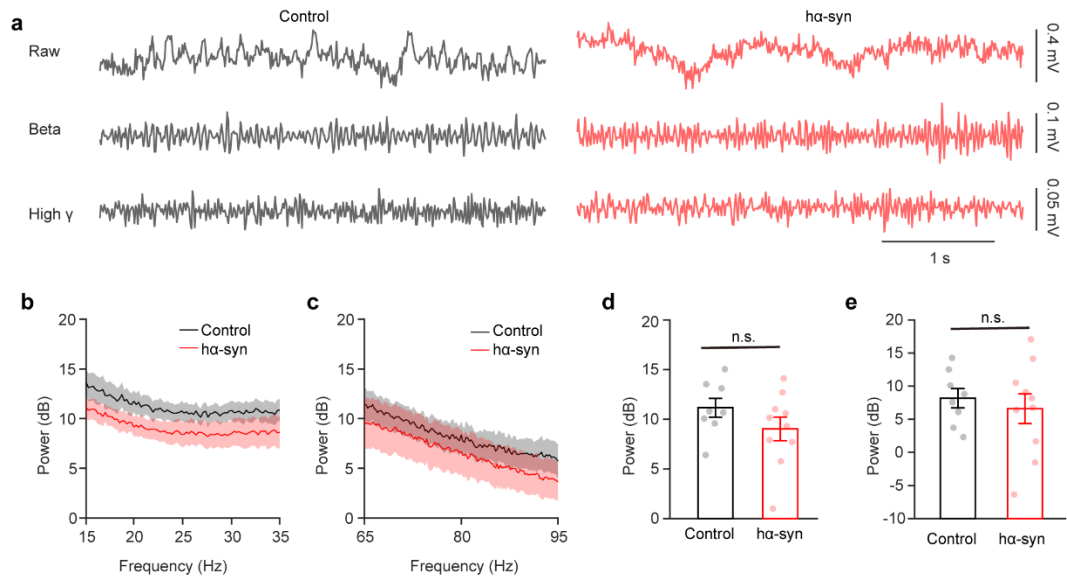

**Supplementary Fig. 4**  $\alpha$ -Synuclein aggregates have no significant effect on spontaneous LFP activity in the OB. **a** Raw traces (top) and filtered beta (middle) and high-gamma (bottom) oscillations in the LFP signals recorded from representative mice in the control and ha-syn groups. **b** and **c** The averaged power spectrum of the ongoing beta (**b**) and high-gamma (**c**) LFP signals across each group of mice recorded. **d** and **e** Statistical analysis of the difference in power in the beta (**d**) and high-gamma (**e**) bands between recordings from the control ( $n = 8$ ) and ha-syn ( $n = 10$ ) groups. n.s., not significant. Data are presented as the mean  $\pm$  SEM.

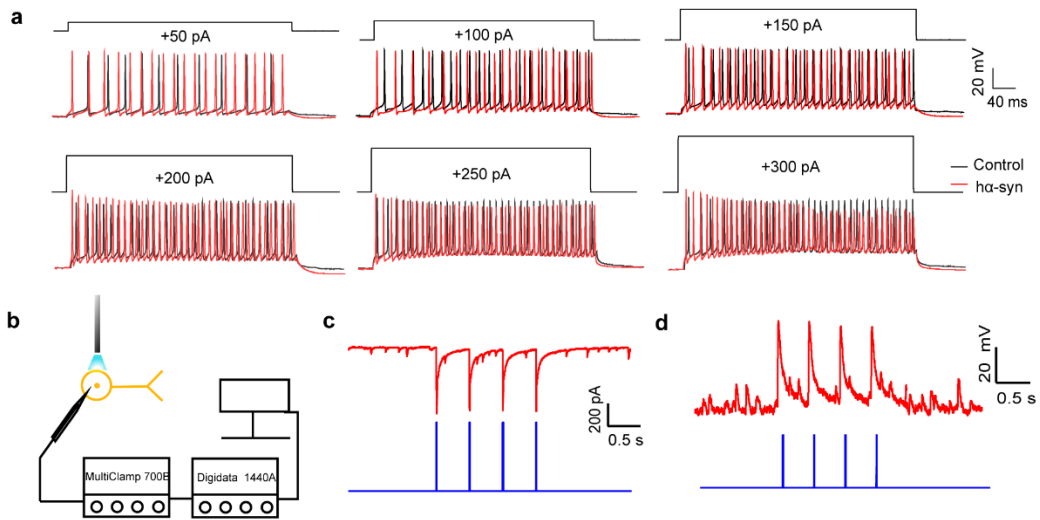

**Supplementary Fig. 5** The representative data from patch-clamp recordings. **a** The representative current injection-evoked mitral cell APs recorded with the whole-cell patch-clamping mode. **b** Diagram of optogenetic activation of the granule cells. **c** and **d** The representative light-evoked currents (**c**) and APs (**d**) recorded from a granule cell.

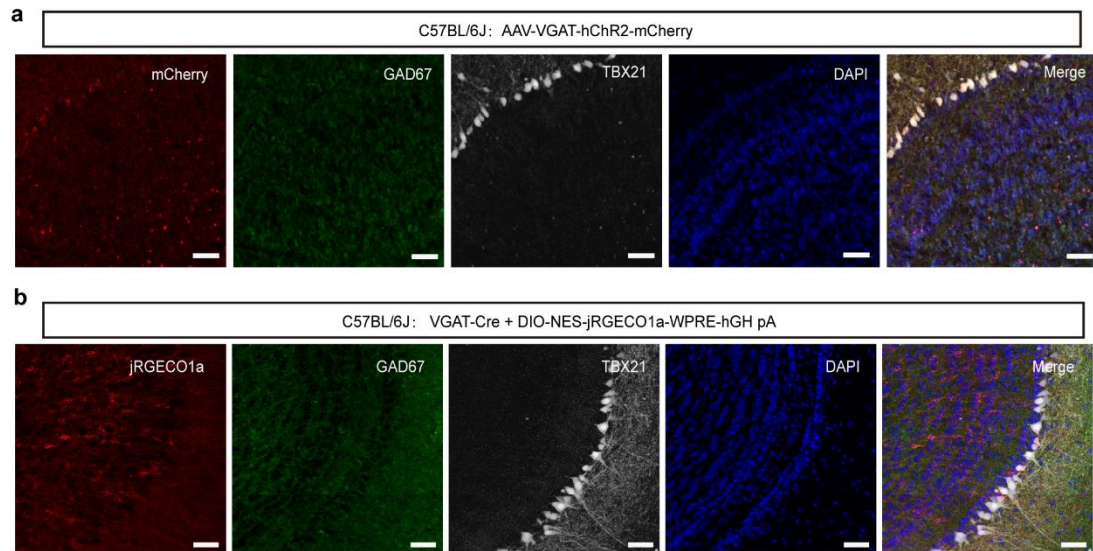

**Supplementary Fig. 6** Verification of the expression specificity for the virus with VGAT promoter. The representative immunofluorescence images show that the hChR2-mCherry (**a**) and jRGECO1a (**b**) expressed mainly in granule cell layer. GAD67, a marker for GABAergic neurons; TBX21, a marker for M / T cells in OB. Scale bars = 50  $\mu$ m.
